# Supplementary figures and images for: The global distribution of the arbovirus vectors Aedes aegypti and Ae. albopictus
Source: eLife journal article supplement (doi:10.7554/elife.08347), 2015-06-30

1)

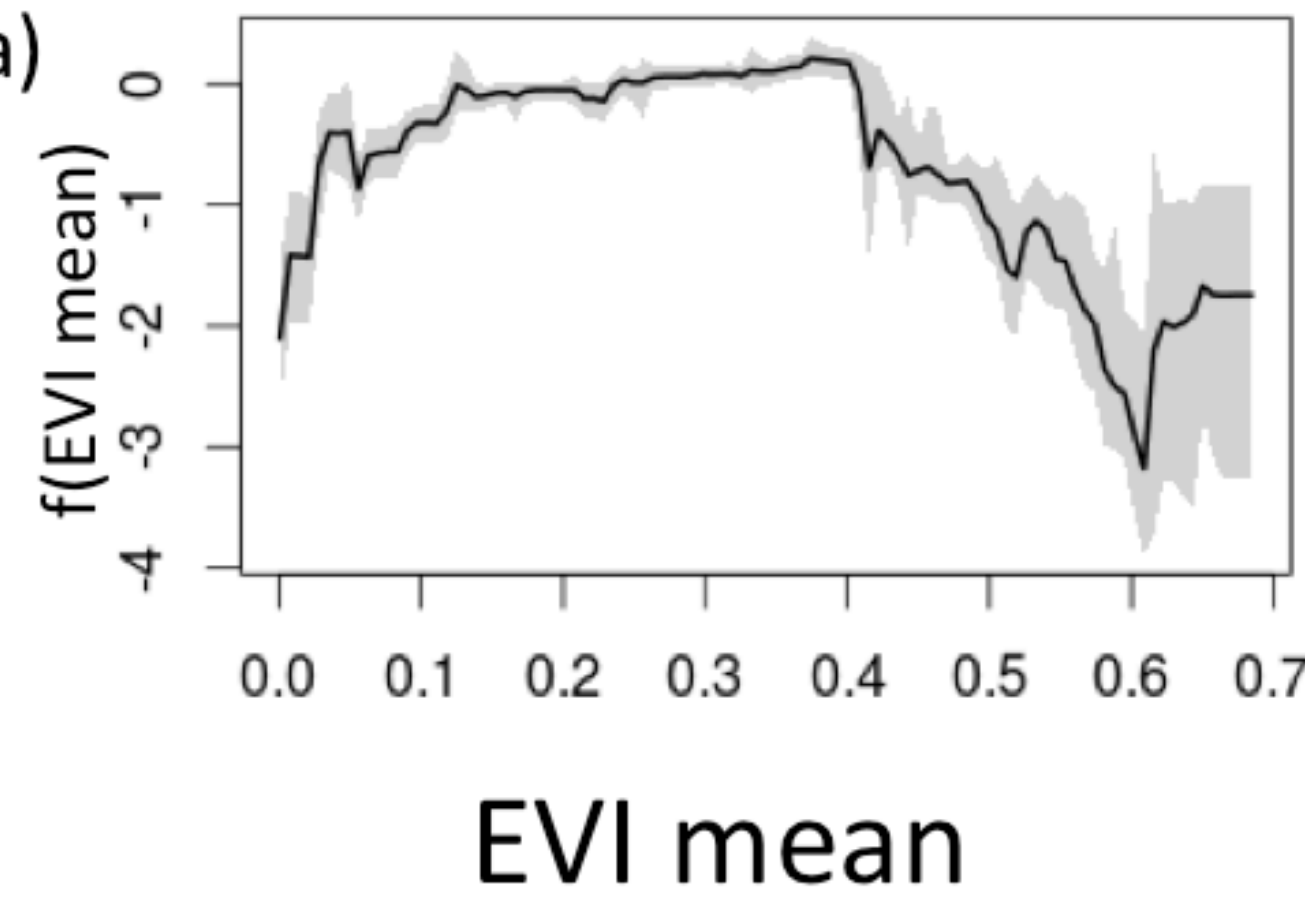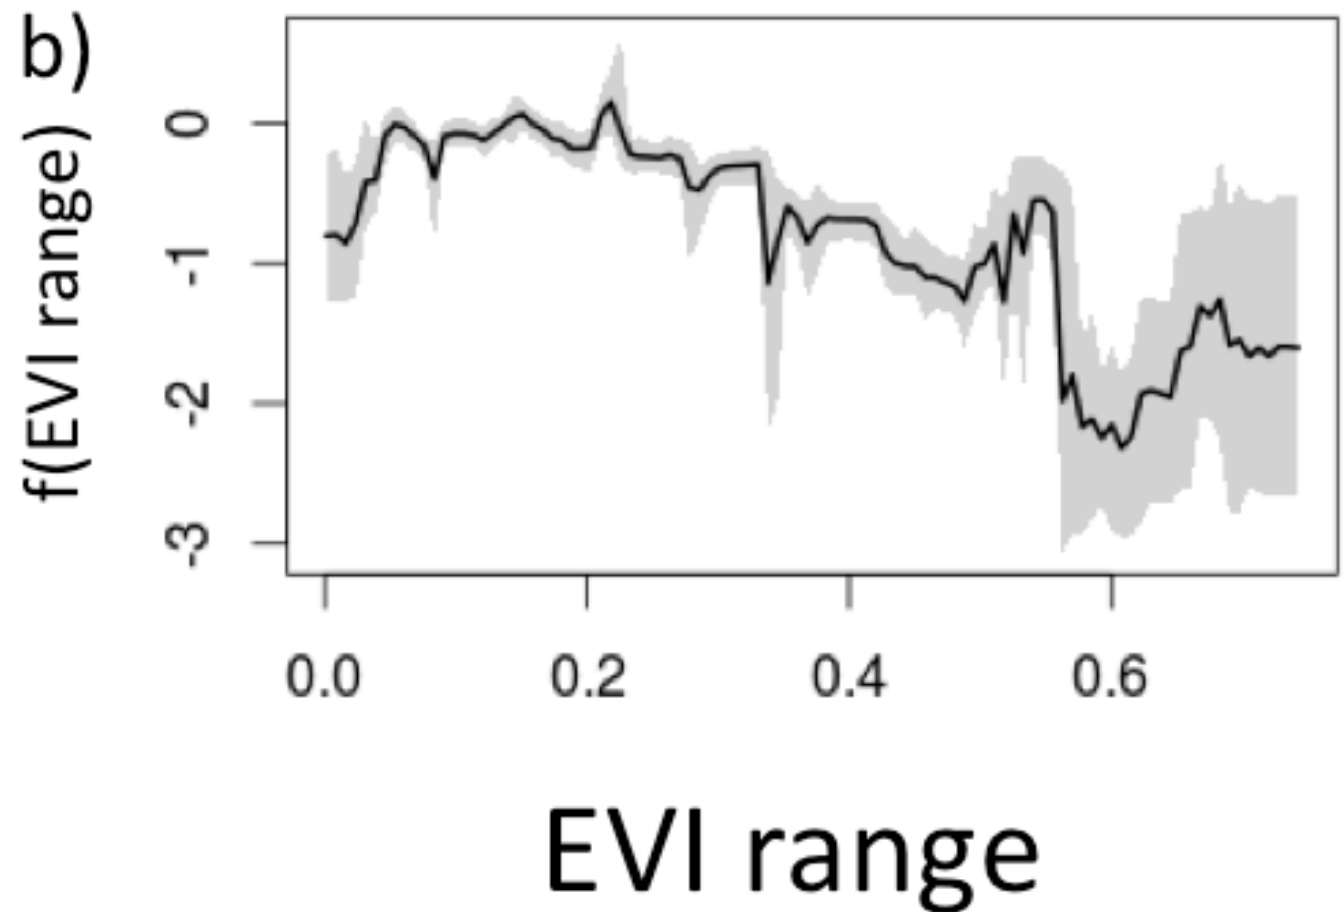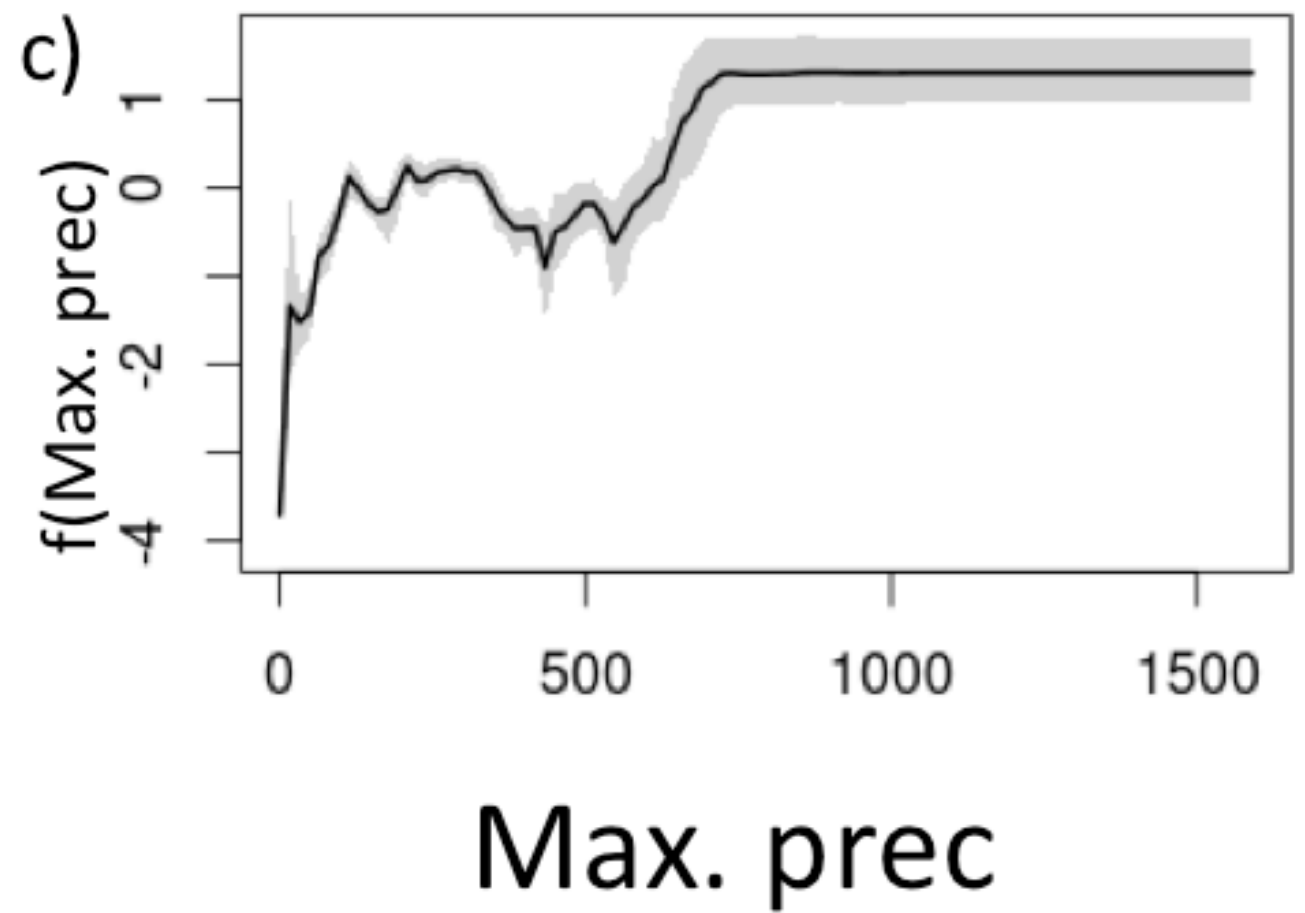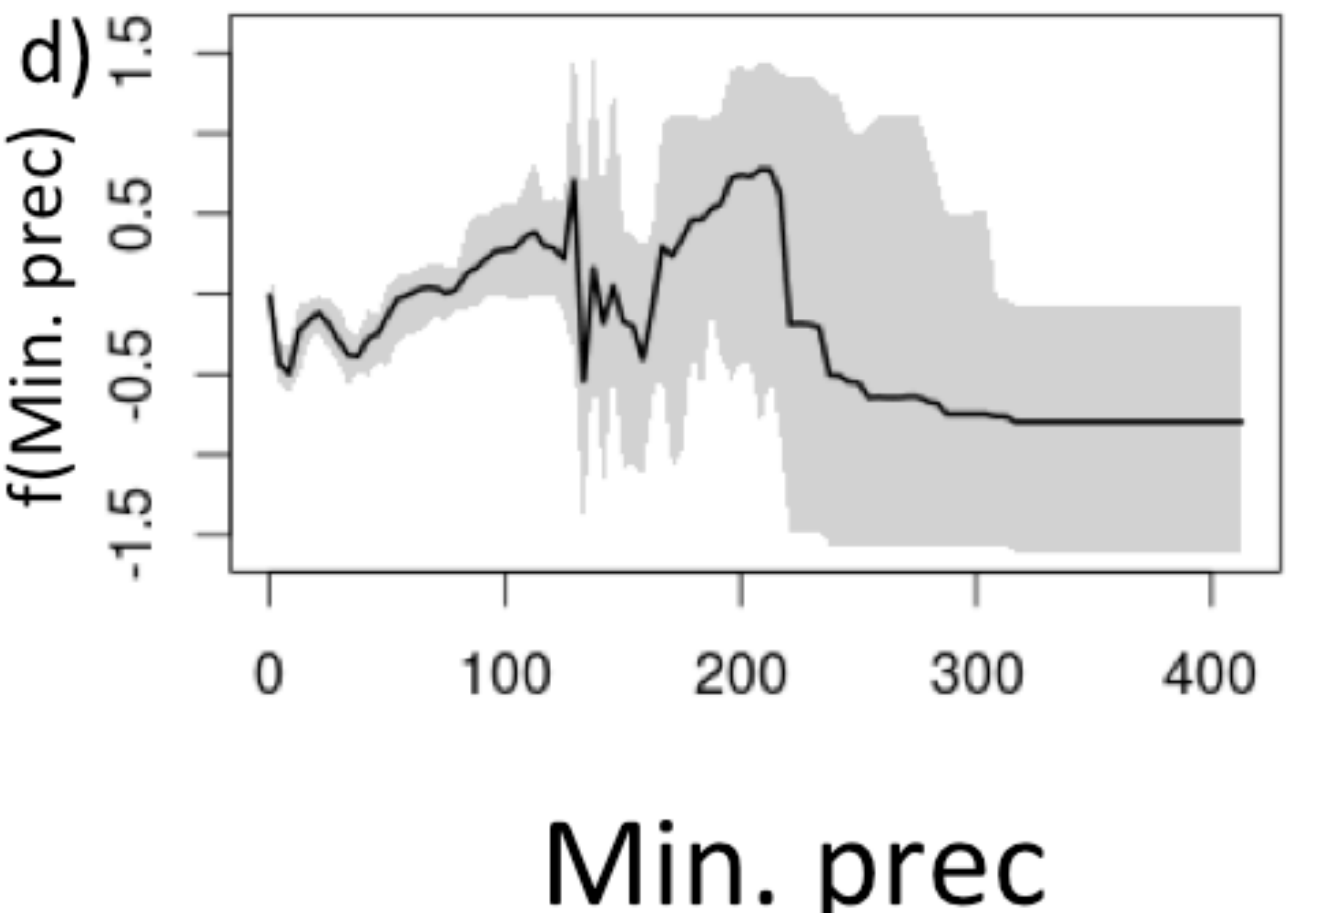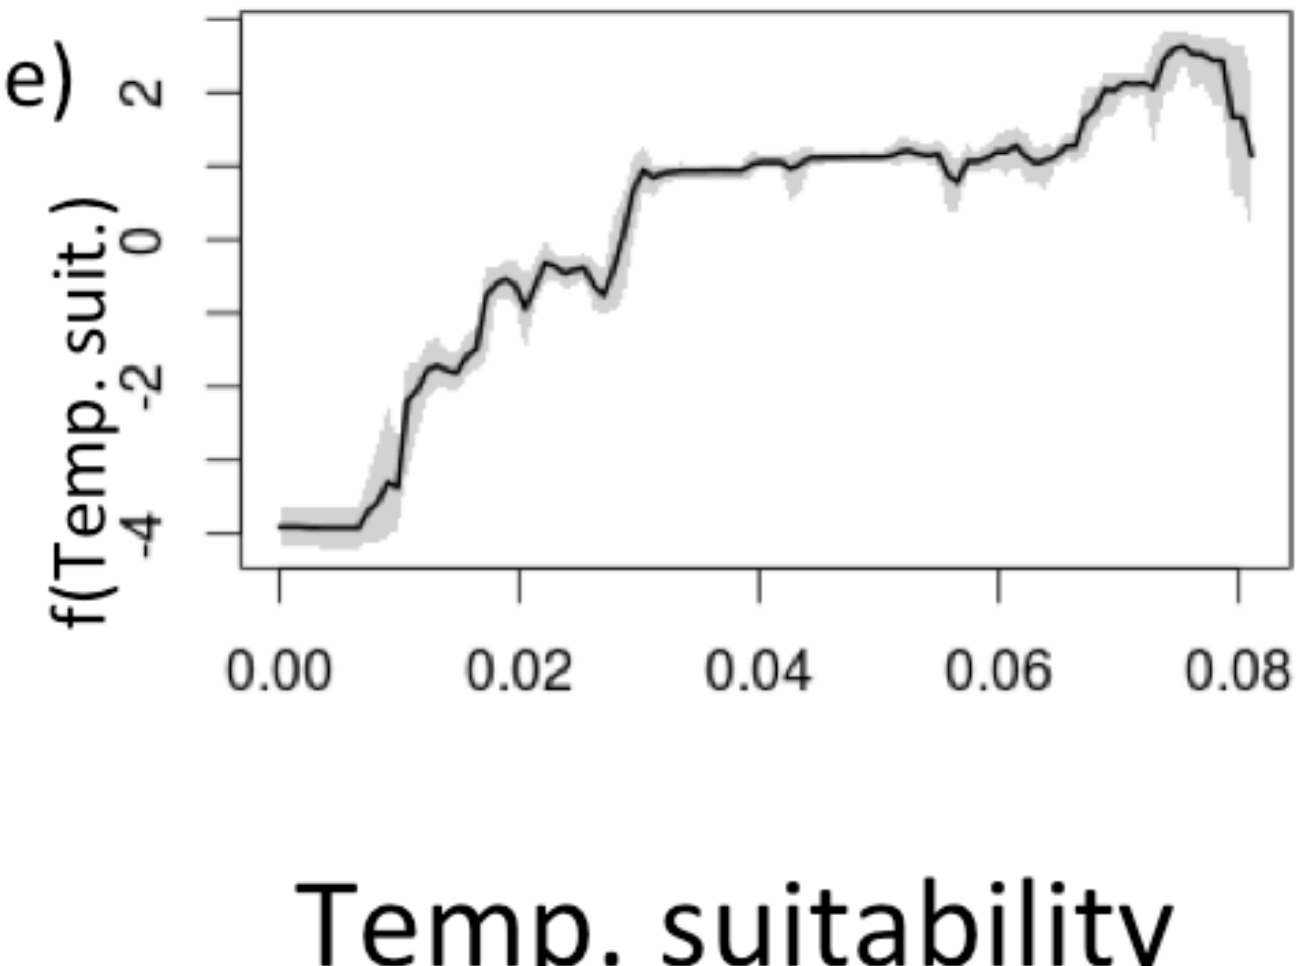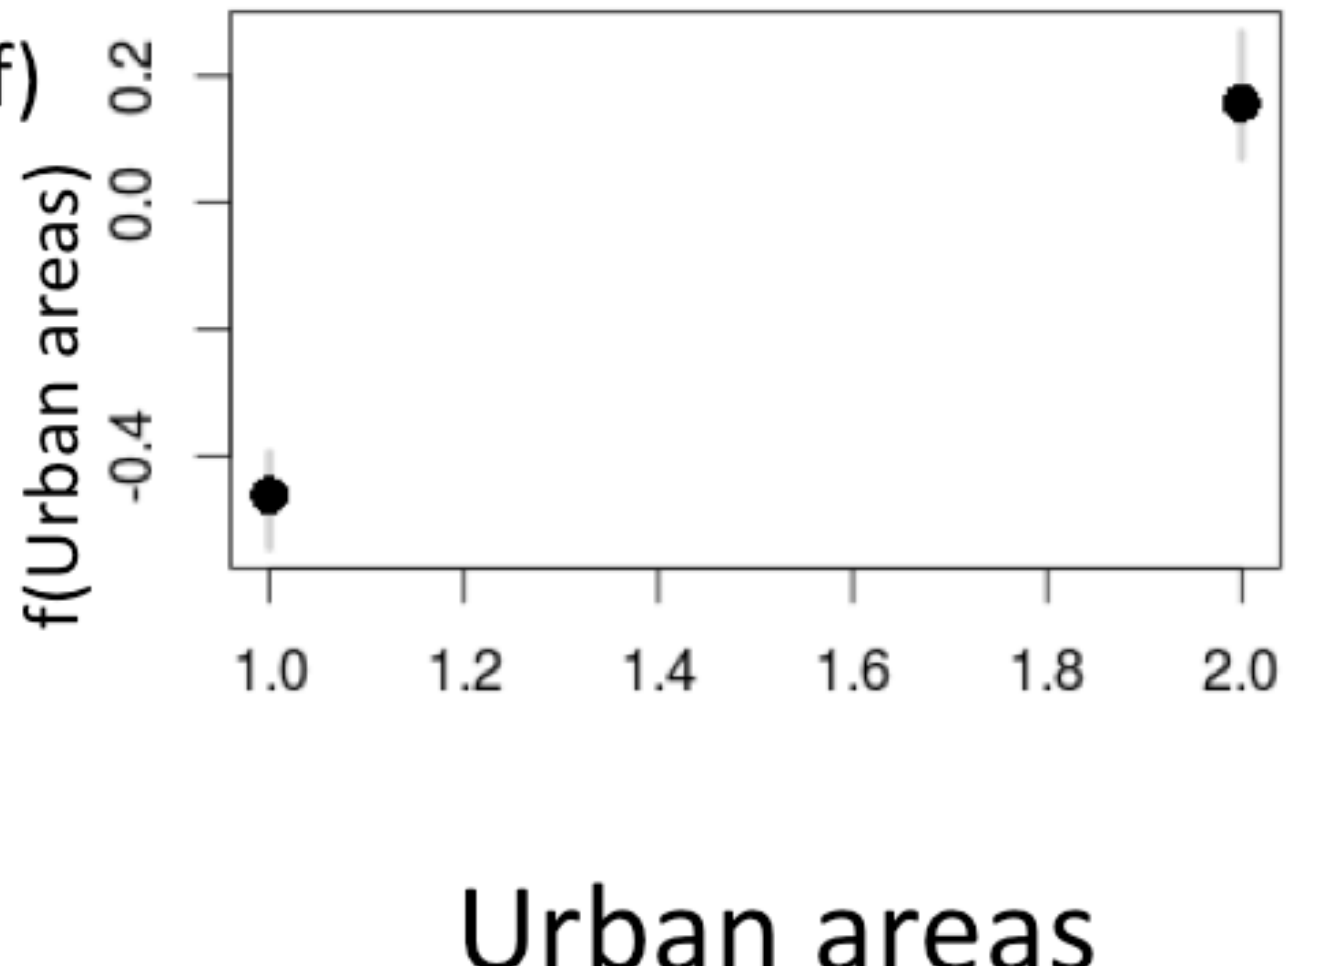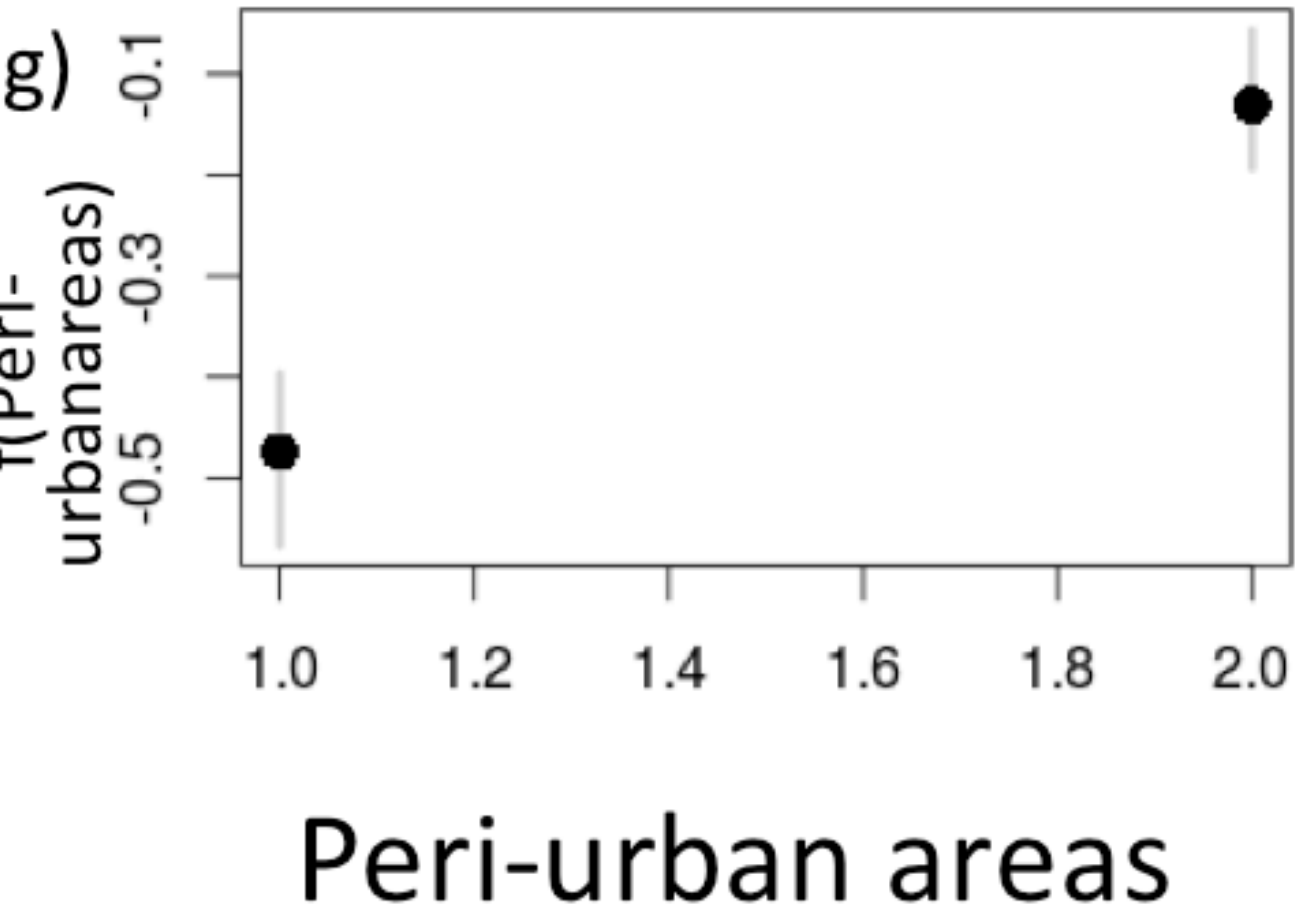

2)

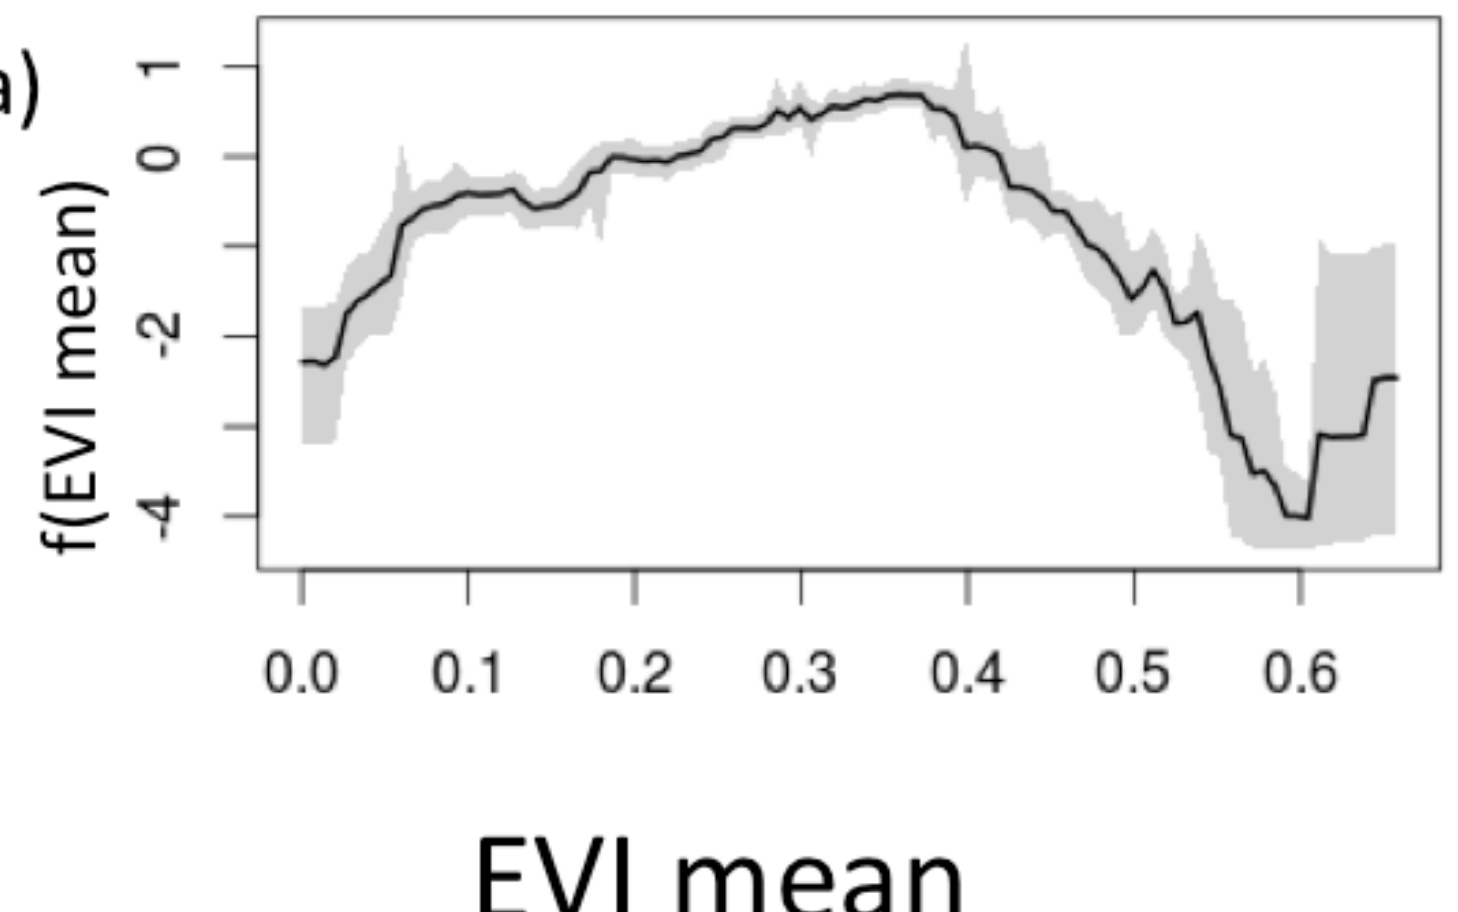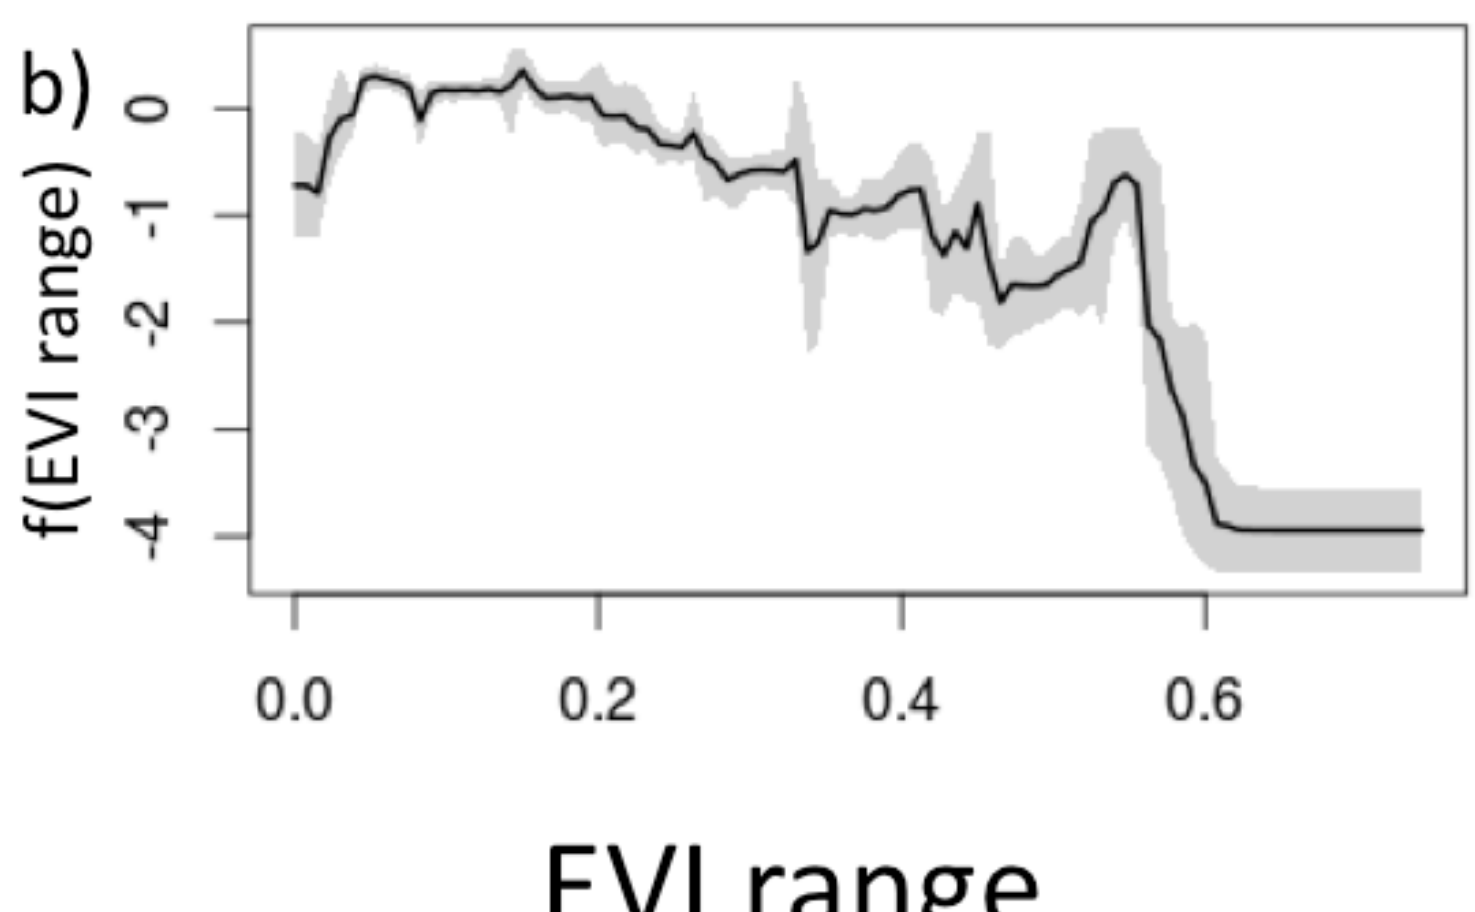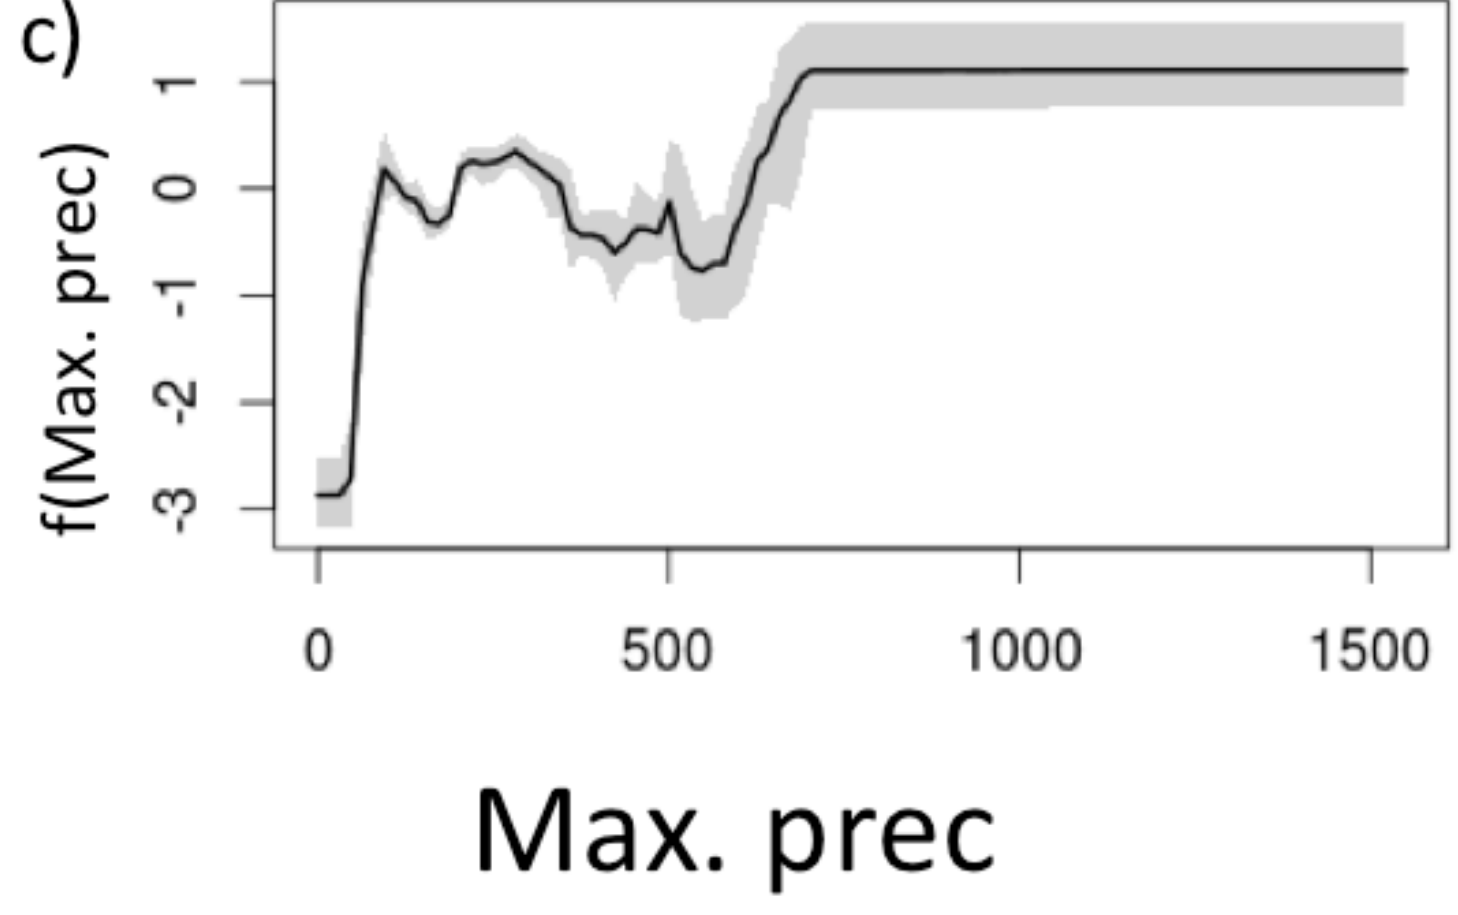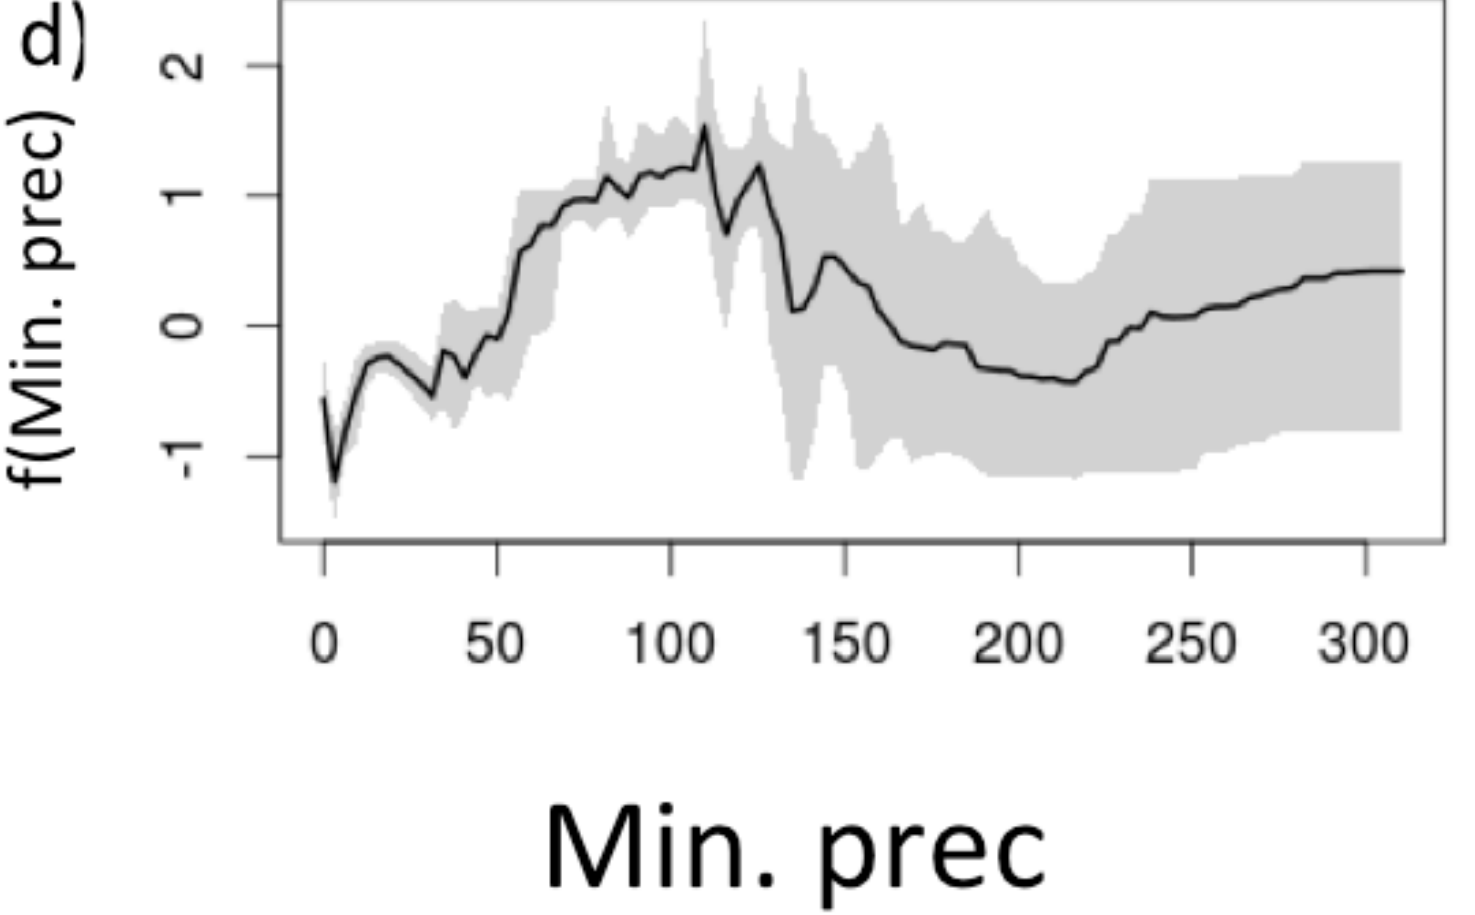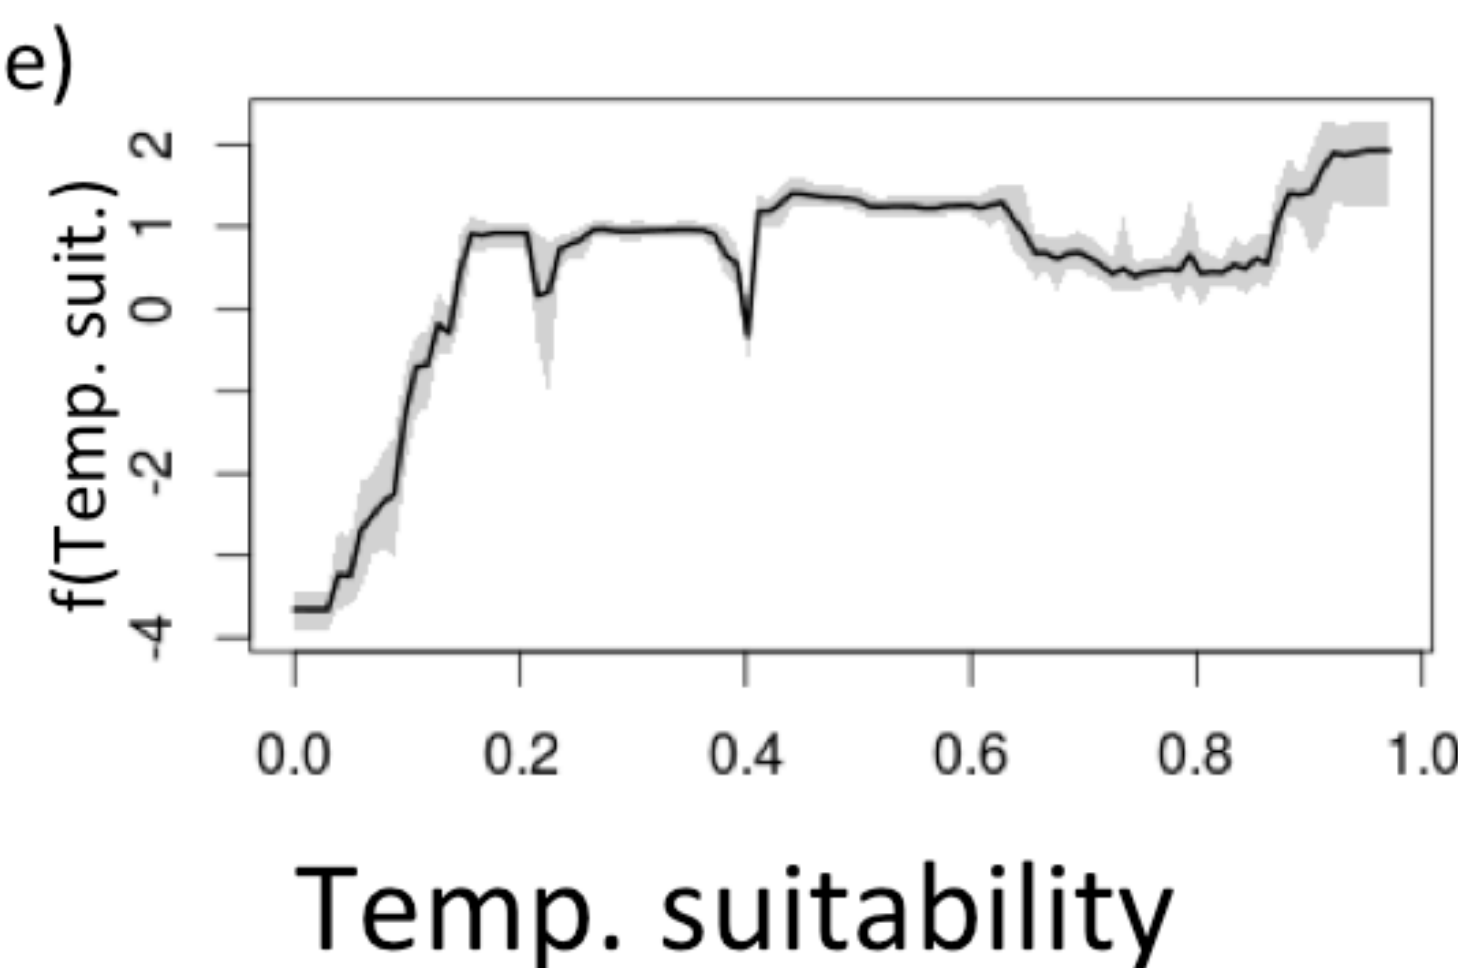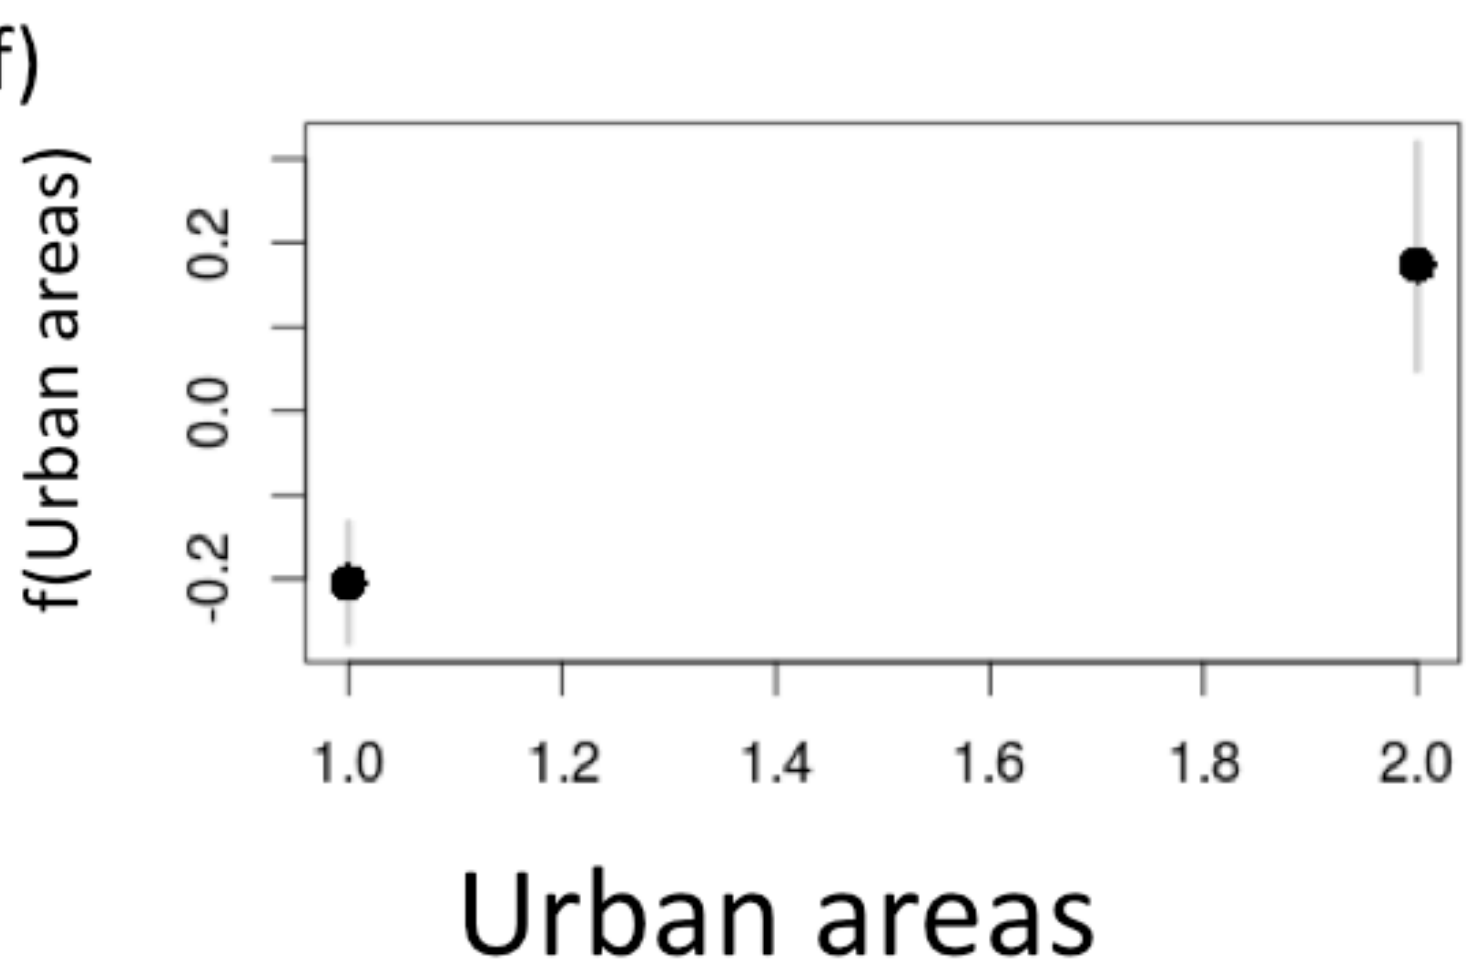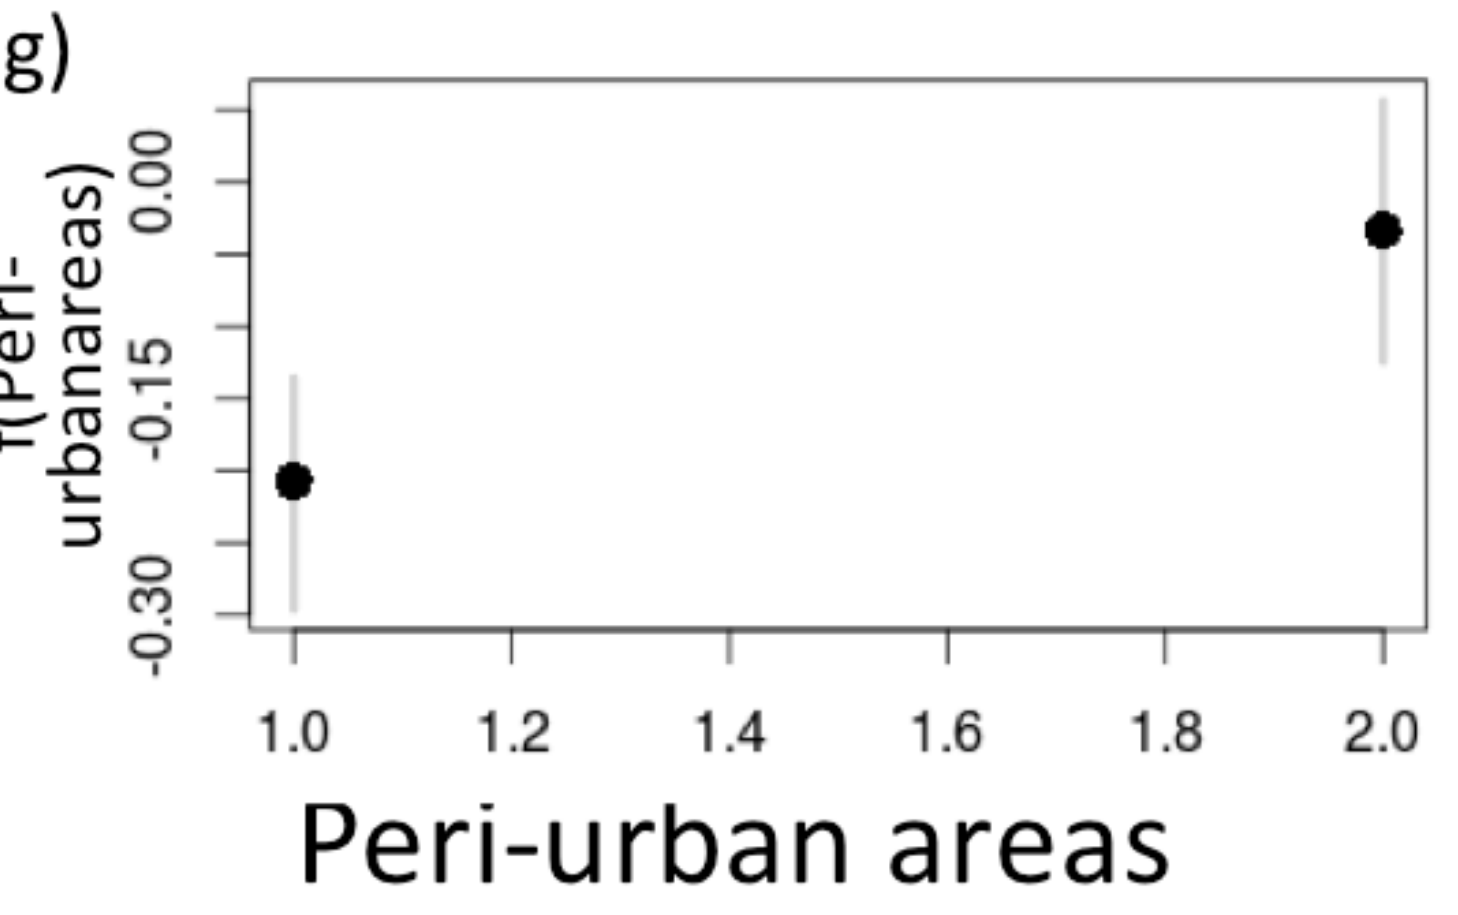

Supplement: supp [file elife-08347-supp-v2.zip]

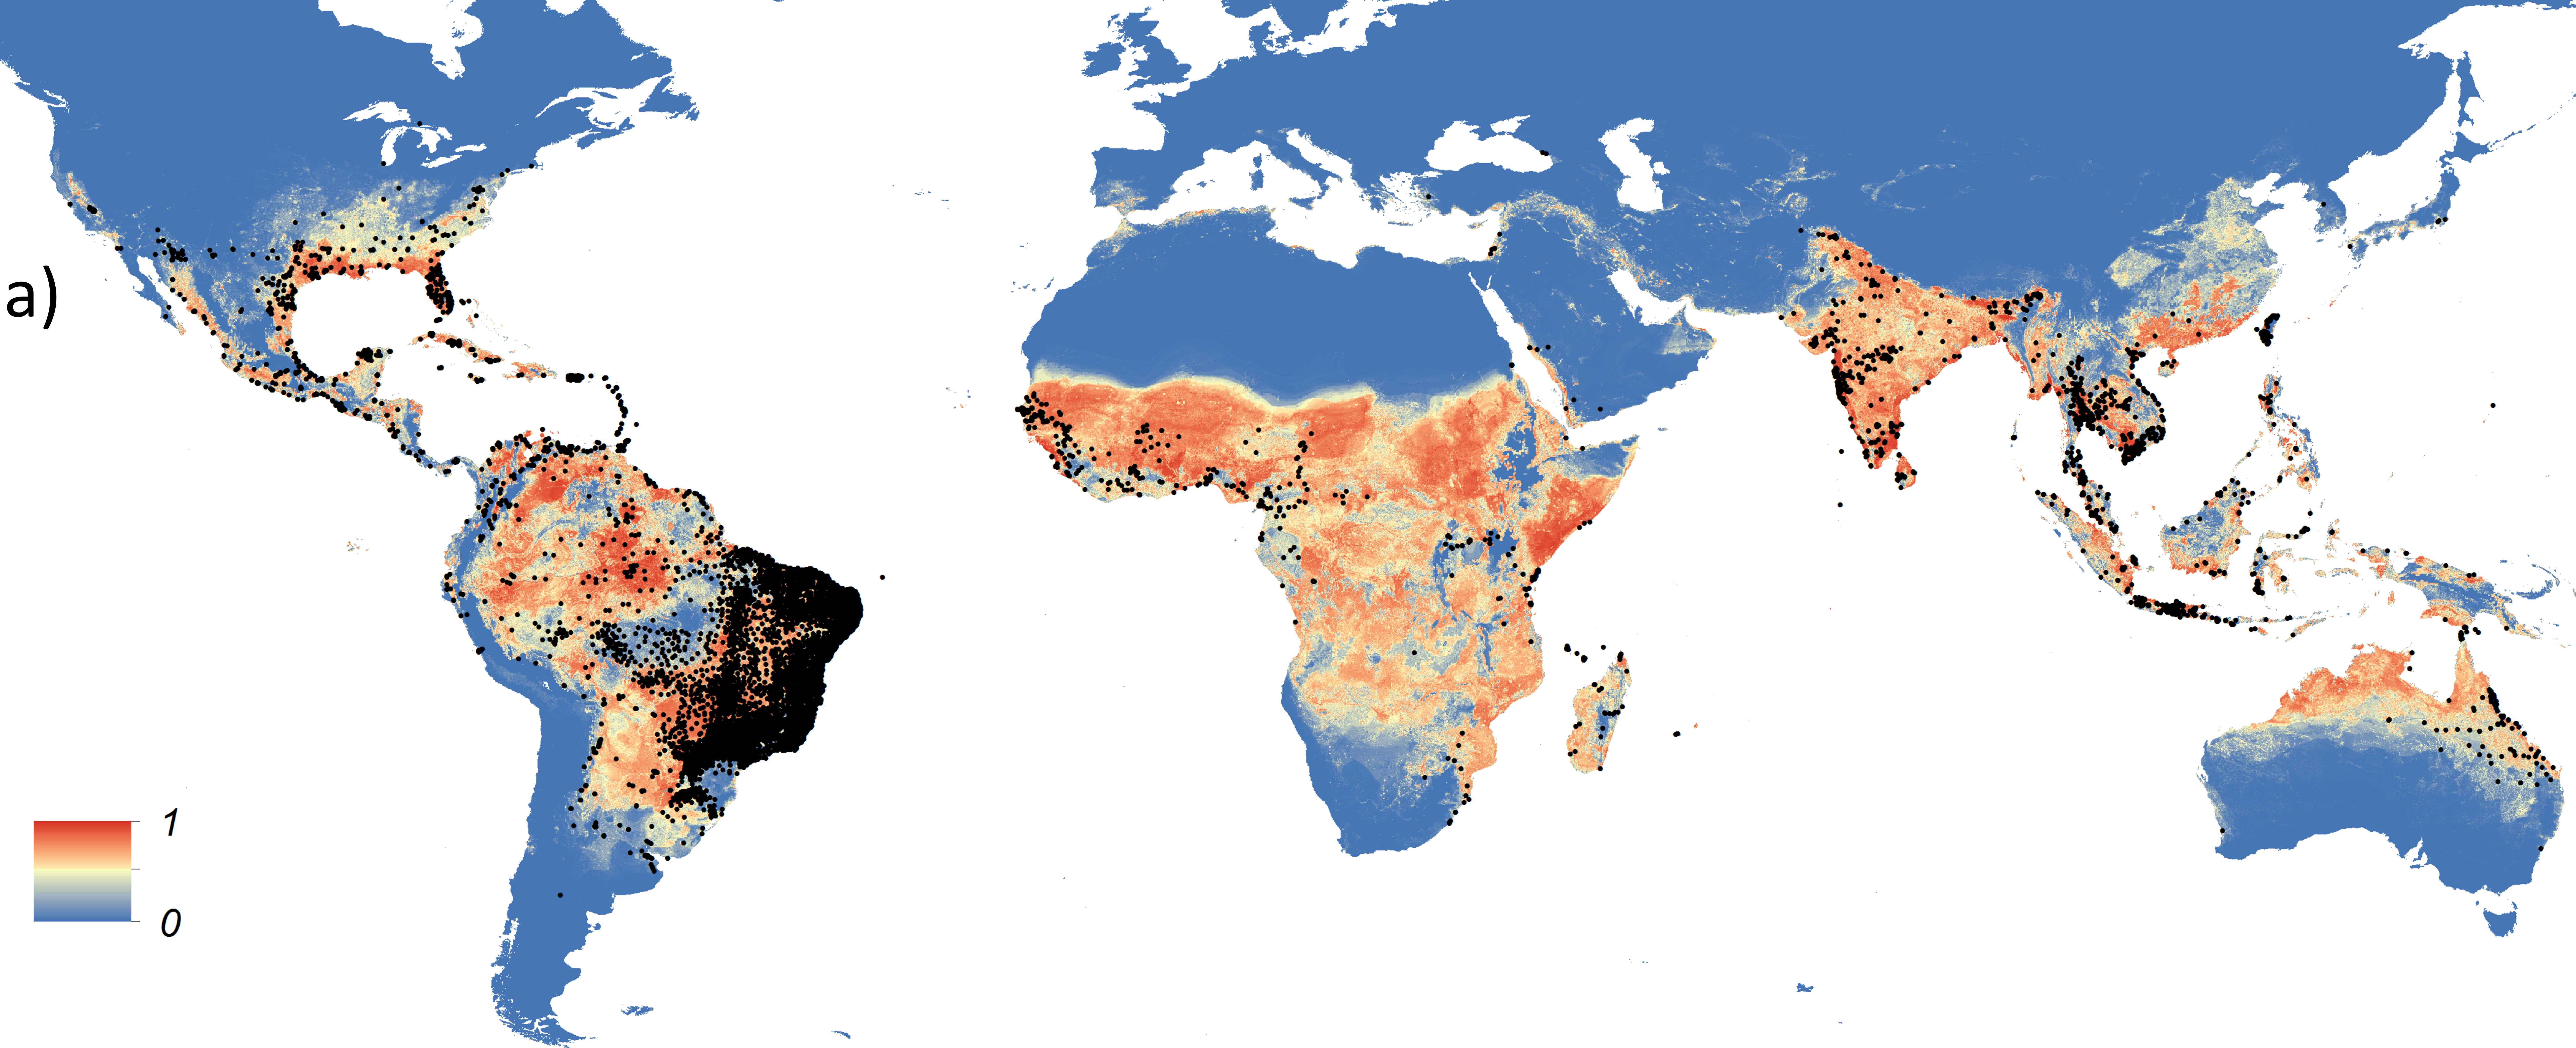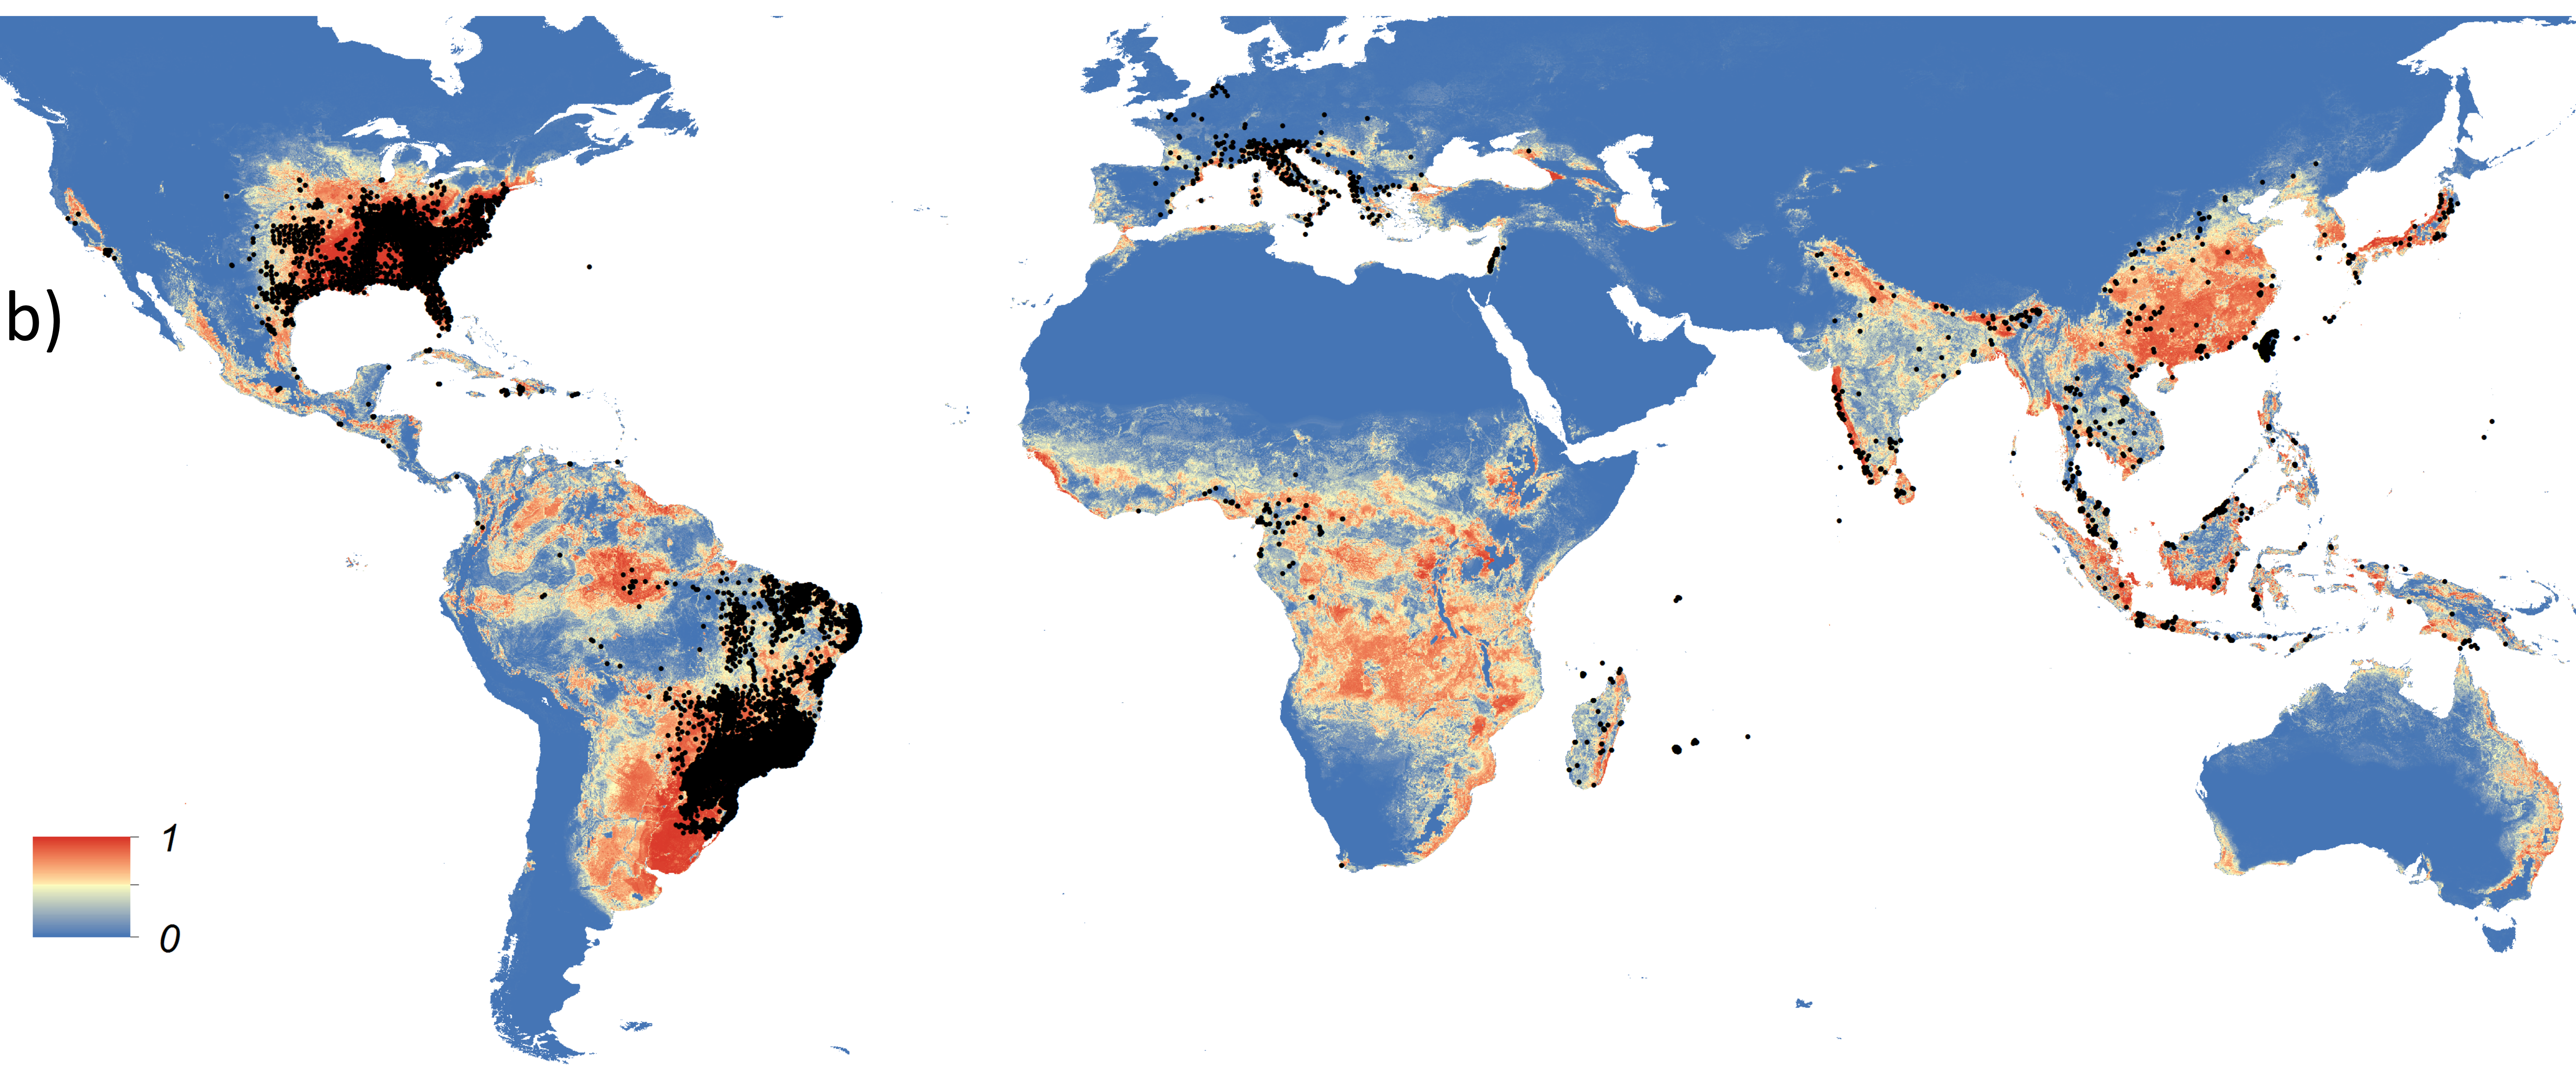

Supplement: supp [file elife-08347-supp-v2.zip]

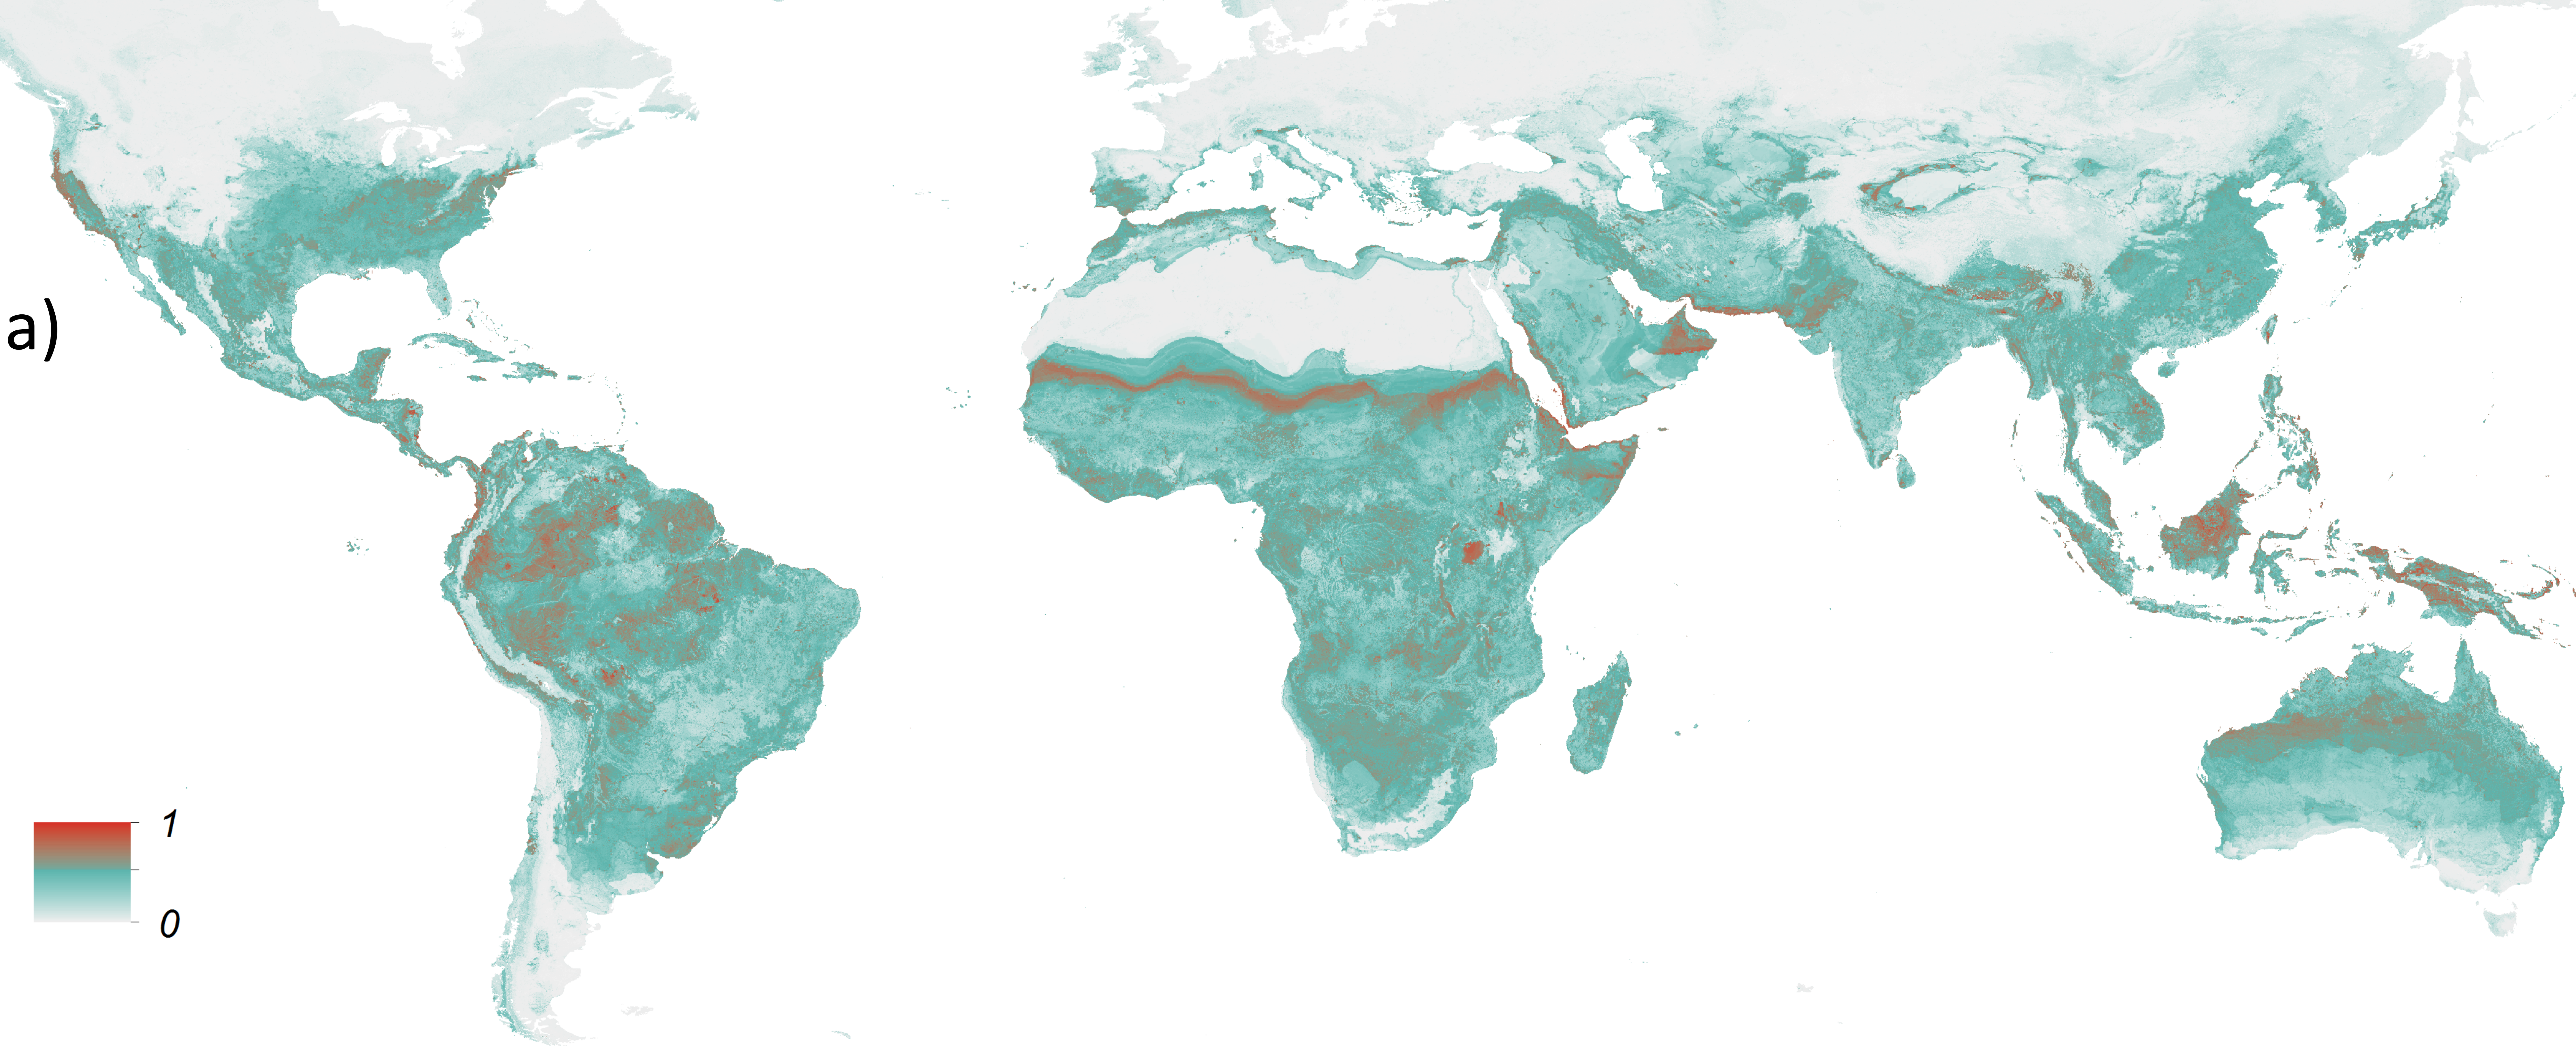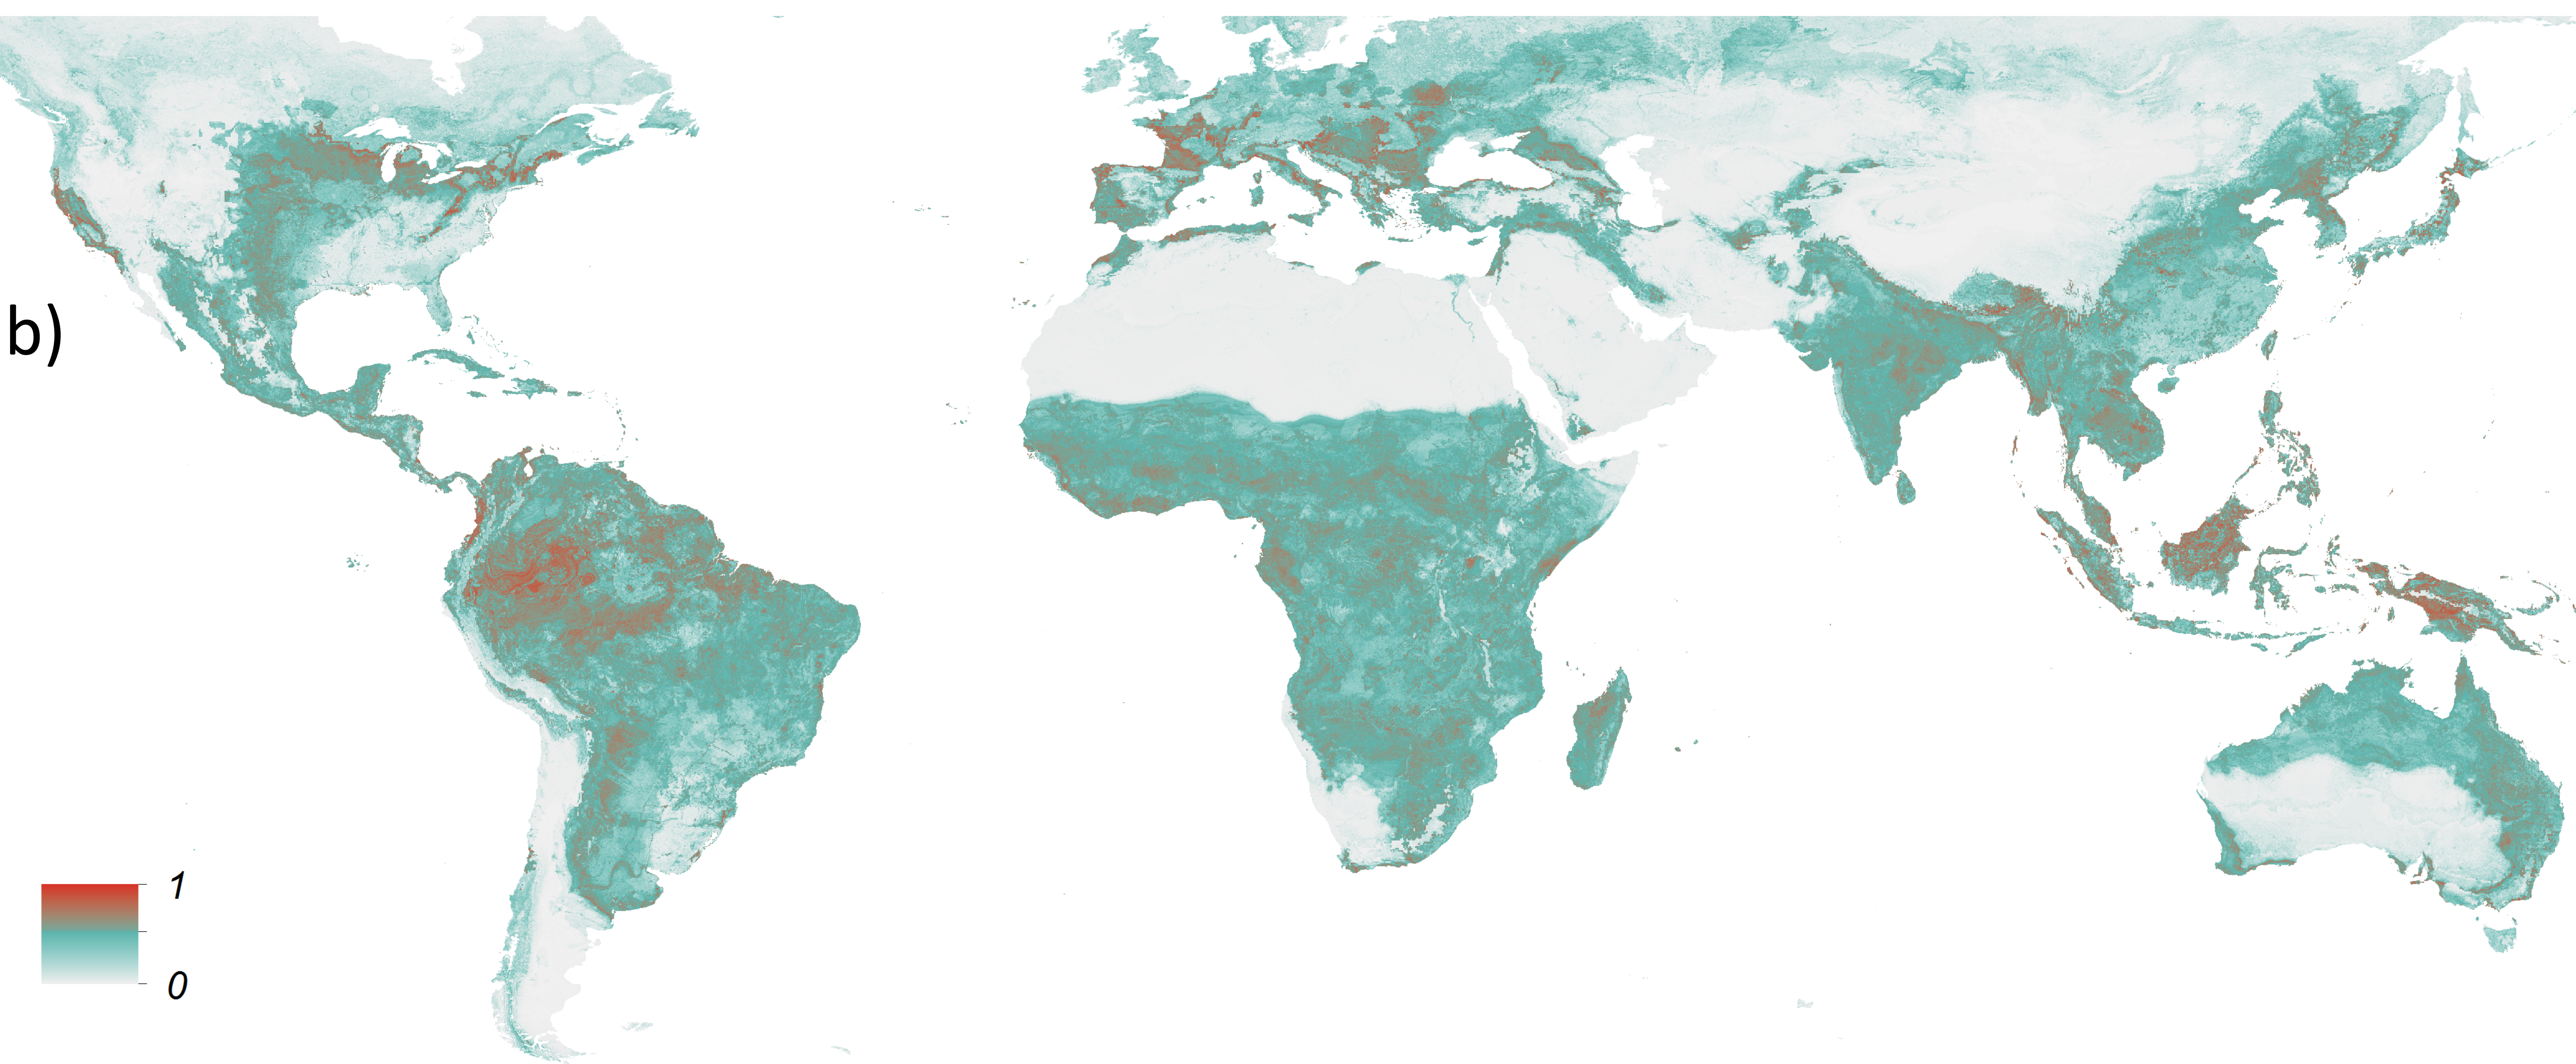

Supplement: supp [file elife-08347-supp-v2.zip]
